# Supplementary material for: Reaction of [RuIII(edta)(H2O)]? with H2O2 in aqueous solution. Kinetic and mechanistic investigation
Source: Royal Society of Chemistry journal article supplement (doi:10.1039/b617119m), 2007-01-01
Supplement: b617119m.pdf [file b617119m.pdf]

### Supporting Information

#### Reaction of $[\text{Ru}^{\text{III}}(\text{edta})(\text{H}_2\text{O})]^-$ with $\text{H}_2\text{O}_2$ in aqueous solution. Kinetic and mechanistic investigation

Debabrata Chatterjee,\* Anannya Mitra and Rudi van Eldik\*

#### Kinetic traces at 271 nm

Experimental conditions:  $[\text{Ru}^{\text{III}}(\text{edta})] = 5 \times 10^{-5} \text{ M}$ ,  $[\text{H}_2\text{O}_2] = 0.015 \text{ M}$ , Temp. = 4.5 °C, pH = 5.1

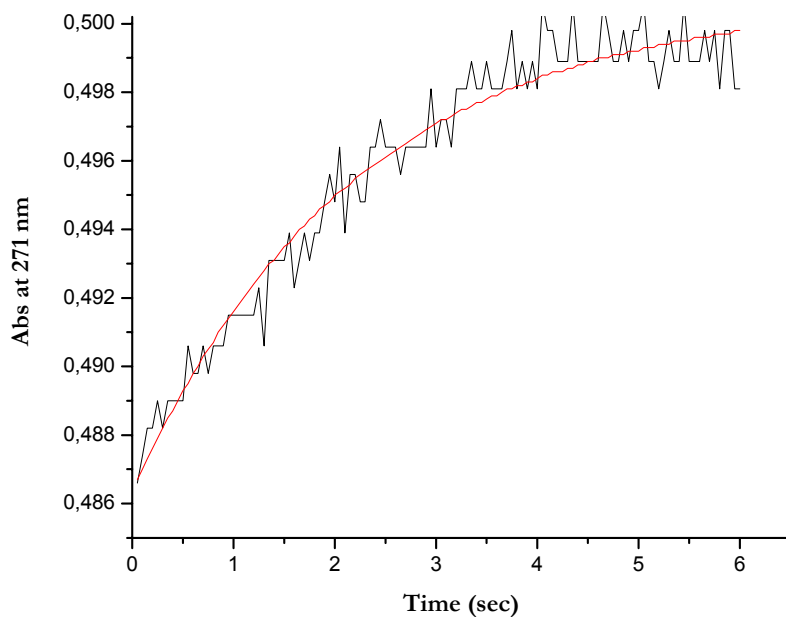

$$k_{\text{obs}} = 0.34 \text{ s}^{-1}$$

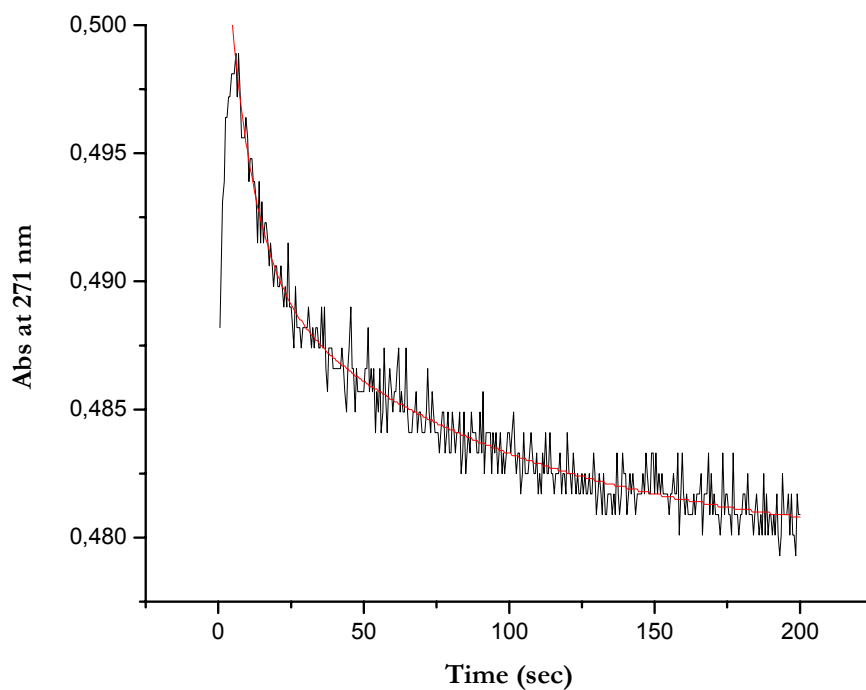

Two-exponential fit:  $k_{\text{fast}} = 0.086 \text{ s}^{-1}$  and  $k_{\text{slow}} = 0.007 \text{ s}^{-1}$

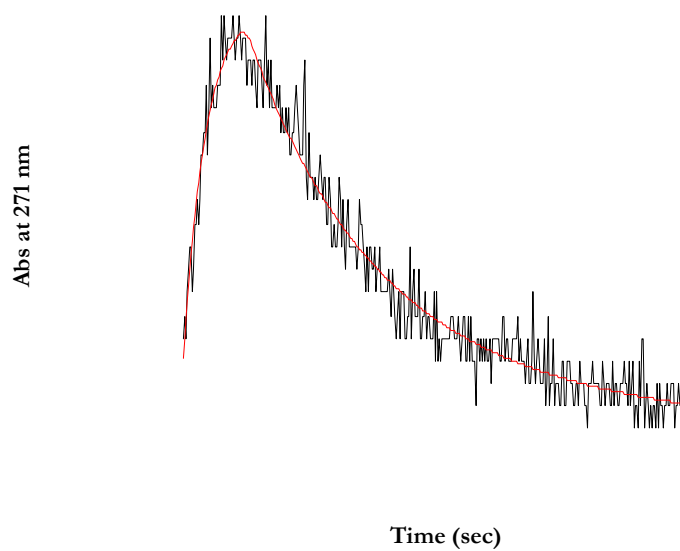

Two-exponential fit:  $k_{\text{fast}} = 0.36 \text{ s}^{-1}$  and  $k_{\text{slow}} = 0.091 \text{ s}^{-1}$

**Kinetic traces at 391 nm**

Experimental conditions:  $[\text{Ru}^{\text{III}}(\text{edta})] = 5 \times 10^{-5} \text{ M}$ ,  $[\text{H}_2\text{O}_2] = 0.015 \text{ M}$ , Temp. = 4.5 °C, pH = 5.1

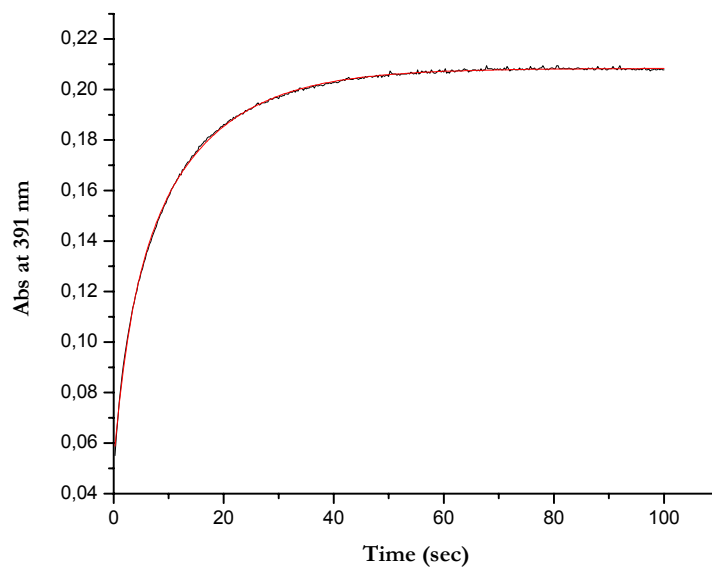

Two-exponential fit:  $k_{\text{fast}} = 0.33 \text{ s}^{-1}$  and  $k_{\text{slow}} = 0.075 \text{ s}^{-1}$

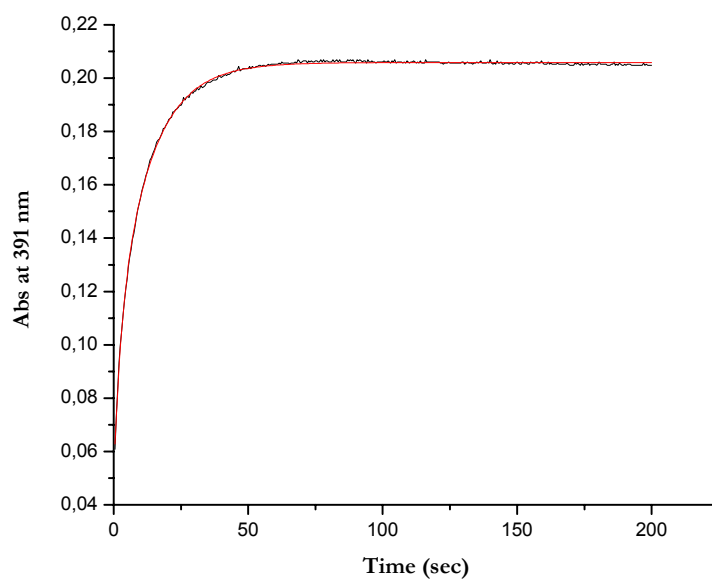

Two-exponential fit:  $k_{\text{fast}} = 0.34 \text{ s}^{-1}$  and  $k_{\text{slow}} = 0.080 \text{ s}^{-1}$
